# Supplementary material for: A more accurate indicator to evaluate oxidative stress in rat plasma with osteoporosis
Source: Royal Society of Chemistry journal article supplement (doi:10.1039/d2ra05572d), 2023-01-01
Supplement: d2ra05572d1.pdf [file d2ra05572d1.pdf]

**Supplementary Materials 1.** Results of nonspecific binding for the analysis of Hcy-NEM, Cys-NEM, cystine and homocystine at three concentrations in PBS by HF-CF-UF with polysulfone and polyacrylonitrile hollow fiber ( $n=5$ )

| Analyte     | Standard ( $\mu\text{mol}\cdot\text{L}^{-1}$ ) | Obtained <sup>1</sup> ( $\mu\text{mol}\cdot\text{L}^{-1}$ ) (mean $\pm$ SD) | Obtained/Standard <sup>1</sup> (% , mean $\pm$ SD) | Obtained <sup>2</sup> ( $\mu\text{mol}\cdot\text{L}^{-1}$ ) (mean $\pm$ SD) | Obtained/Standar <sup>2</sup> (% , mean $\pm$ SD) |
|-------------|------------------------------------------------|-----------------------------------------------------------------------------|----------------------------------------------------|-----------------------------------------------------------------------------|---------------------------------------------------|
| Hcy-NEM     | 0.1                                            | 0.113 $\pm$ 0.004                                                           | 106 $\pm$ 1.69                                     | 0.104 $\pm$ 0.002                                                           | 104 $\pm$ 2.59                                    |
|             | 1                                              | 0.995 $\pm$ 0.118                                                           | 95.5 $\pm$ 6.41                                    | 1.06 $\pm$ 0.042                                                            | 105 $\pm$ 4.20                                    |
|             | 4                                              | 3.91 $\pm$ 0.056                                                            | 95.6 $\pm$ 2.12                                    | 3.79 $\pm$ 0.082                                                            | 94.8 $\pm$ 2.05                                   |
| Cys-NEM     | 0.1                                            | 0.0906 $\pm$ 0.004                                                          | 89.3 $\pm$ 2.26                                    | 0.106 $\pm$ 0.008                                                           | 114 $\pm$ 5.04                                    |
|             | 1                                              | 0.974 $\pm$ 0.047                                                           | 93.1 $\pm$ 3.50                                    | 0.991 $\pm$ 0.042                                                           | 101 $\pm$ 8.83                                    |
|             | 4                                              | 3.49 $\pm$ 0.112                                                            | 94.3 $\pm$ 3.31                                    | 4.02 $\pm$ 0.100                                                            | 109 $\pm$ 2.71                                    |
| cystine     | 0.04                                           | 0.0427 $\pm$ 0.112                                                          | 107 $\pm$ 13.11                                    | 0.0413 $\pm$ 0.003                                                          | 103 $\pm$ 8.23                                    |
|             | 0.4                                            | 0.374 $\pm$ 0.037                                                           | 96.3 $\pm$ 8.34                                    | 0.383 $\pm$ 0.026                                                           | 95.8 $\pm$ 6.88                                   |
|             | 1.6                                            | 1.71 $\pm$ 0.048                                                            | 97.9 $\pm$ 1.53                                    | 1.59 $\pm$ 0.067                                                            | 99.1 $\pm$ 4.21                                   |
| homocystine | 0.004                                          | 0.00423 $\pm$ 0.164 $\times 10^{-3}$                                        | 106 $\pm$ 4.10                                     | 0.00401 $\pm$ 0.329 $\times 10^{-3}$                                        | 100 $\pm$ 8.21                                    |
|             | 0.04                                           | 0.0450 $\pm$ 0.003                                                          | 108 $\pm$ 7.79                                     | 0.0381 $\pm$ 0.001                                                          | 95.3 $\pm$ 2.97                                   |
|             | 0.32                                           | 0.367 $\pm$ 0.008                                                           | 99.1 $\pm$ 2.34                                    | 0.300 $\pm$ 0.007                                                           | 93.6 $\pm$ 2.14                                   |
| Hcy-D4-NEM  | 3.6                                            | —                                                                           | 89.4 $\pm$ 11.85                                   | —                                                                           | 94.4 $\pm$ 7.68                                   |

\* 1 represent polysulfone hollow fiber and 2 is polyacrylonitrile hollow fiber

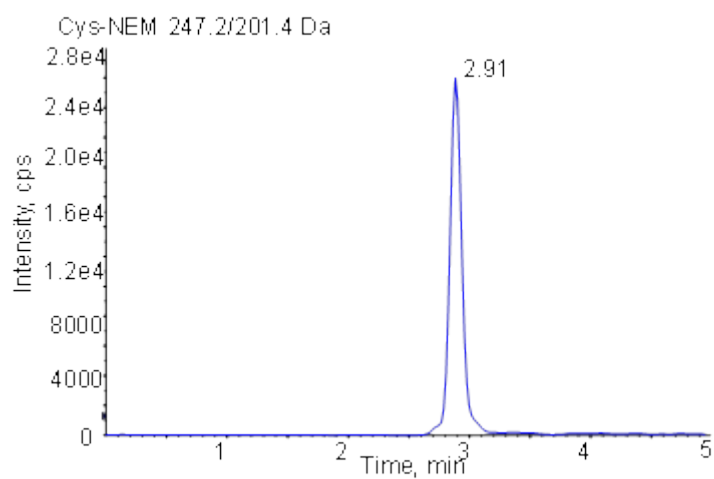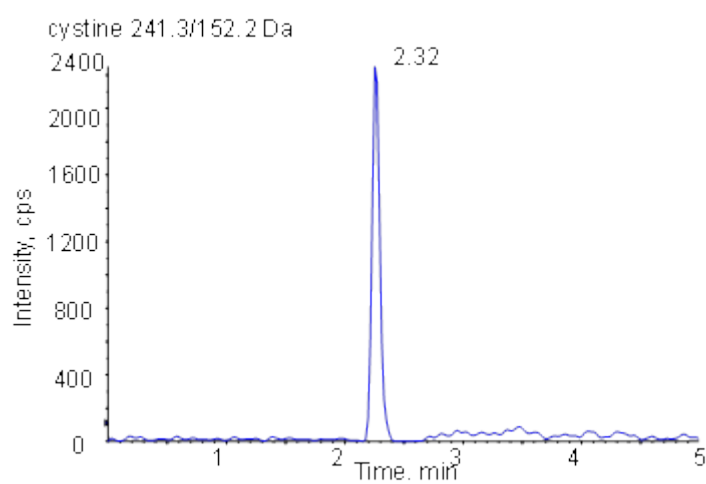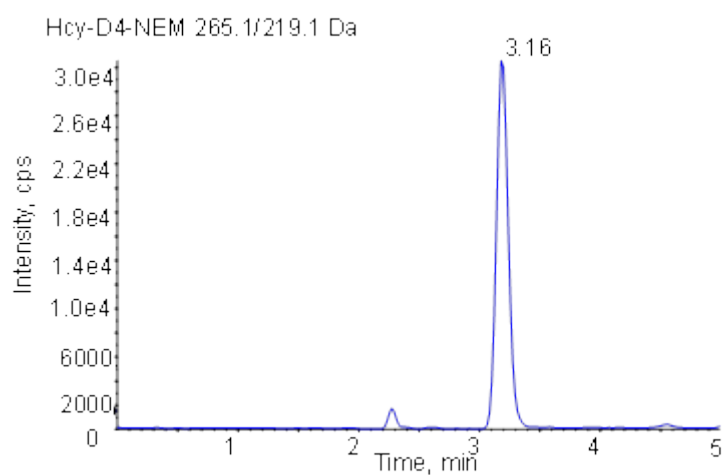

**Supplementary materials 2:** Representative MRM chromatograms of Cys-NEM, cystine, and internal standard in rat plasma sample.

**Supplementary Material 3.** Results of stability for the analysis of Hcy-NEM, Cys-NEM, cystine and homocystine in QC samples at three concentrations ( $n=3$ )

| Analyte     | Added concentration ( $\mu\text{mol}\cdot\text{L}^{-1}$ ) | Room temperature, 26°C, 12 h                                           |         | Freezing at -40 °C for 14 days                                         |         | Freeze-thaw three cycles                                               |         | After processing, 15°C, 24 h                                           |         |
|-------------|-----------------------------------------------------------|------------------------------------------------------------------------|---------|------------------------------------------------------------------------|---------|------------------------------------------------------------------------|---------|------------------------------------------------------------------------|---------|
|             |                                                           | Measured ( $\mu\text{mol}\cdot\text{L}^{-1}/\text{mean}\pm\text{SD}$ ) | RSD (%) |
| Hcy-NEM     | 0.1                                                       | 0.105±0.003                                                            | 3.0     | 0.105±0.008                                                            | 7.6     | 0.112±0.004                                                            | 3.5     | 0.108±0.001                                                            | 0.8     |
|             | 1                                                         | 1.02±0.079                                                             | 7.8     | 1.01±0.033                                                             | 3.3     | 1.01±0.026                                                             | 2.5     | 1.07±0.008                                                             | 0.8     |
|             | 4                                                         | 4.10±0.057                                                             | 1.4     | 3.83±0.139                                                             | 3.6     | 3.66±0.014                                                             | 0.4     | 4.07±0.024                                                             | 0.6     |
| Cys-NEM     | 0.1                                                       | 0.103±0.004                                                            | 3.5     | 0.096±0.008                                                            | 8.2     | 0.099±0.004                                                            | 4.2     | 0.102±0.004                                                            | 4.8     |
|             | 1                                                         | 1.04±0.022                                                             | 2.1     | 0.977±0.048                                                            | 5.0     | 0.891±0.011                                                            | 1.2     | 1.06±0.012                                                             | 1.2     |
|             | 4                                                         | 3.76±0.119                                                             | 3.2     | 3.77±0.044                                                             | 1.2     | 3.47±0.138                                                             | 4.0     | 3.68±0.158                                                             | 4.3     |
| cystine     | 0.04                                                      | 0.042±0.004                                                            | 13.1    | 0.043±0.0003                                                           | 0.7     | 0.042±0.005                                                            | 12.3    | 0.044±0.005                                                            | 11.1    |
|             | 0.4                                                       | 0.402±0.007                                                            | 1.7     | 0.421±0.008                                                            | 1.9     | 0.364±0.005                                                            | 2.6     | 0.390±0.015                                                            | 3.8     |
|             | 1.6                                                       | 1.65±0.036                                                             | 2.2     | 1.69±0.039                                                             | 2.3     | 1.56±0.051                                                             | 3.3     | 1.71±0.146                                                             | 8.5     |
| homocystine | 0.008                                                     | 0.0088±0.0003                                                          | 3.8     | 0.0089±0.0004                                                          | 4.1     | 0.0090±0.0005                                                          | 5.6     | 0.0090±0.0008                                                          | 8.9     |
|             | 0.08                                                      | 0.0908±0.0025                                                          | 2.8     | 0.0837±0.0078                                                          | 9.4     | 0.0731±0.0047                                                          | 6.5     | 0.0862±0.0078                                                          | 9.0     |
|             | 0.32                                                      | 0.319±0.009                                                            | 2.9     | 0.292±0.015                                                            | 5.2     | 0.302±0.008                                                            | 2.8     | 0.317±0.010                                                            | 3.4     |

## 1 Supplementary Material 4

2 The formula derivation process was shown in detail, as below:

3 If we hypothesis the concentrations of Cys ( $C_{cys}$ ) and Cyss ( $C_{cyss}$ ) are both ten  
4 times of the concentrations of Hcy ( $C_{Hcy}$ ) and HHcy ( $C_{HHcy}$ ).  $E^0_{HHcy/Hcy}$  and  
5  $E^0_{Cyss/Cys}$  are the standard potential of Hcy/HHcy and Cys/Cyss, respectively.

6 Before the REDOX reaction, the potential of the REDOX reaction pair of  
7 Hcy/HHcy and Cys/Cyss are  $E^1_{HHcy/Hcy}$  and  $E^1_{Cyss/Cys}$ .

$$8 \quad E^1_{HHcy/Hcy} = E^0_{HHcy/Hcy} + \frac{RT}{nF} \ln \frac{C_{HHcy}}{C_{Hcy}} \quad (2)$$

$$9 \quad E^1_{Cyss/Cys} = E^0_{Cyss/Cys} + \frac{RT}{nF} \ln \frac{C_{Cyss}}{C_{Cys}} \quad (3)$$

10 After peroxide [O] is reacting with Hcy and Cys, the potential of the REDOX reaction  
11 pair of Hcy/HHcy and Cys/Cyss are  $E^2_{HHcy/Hcy}$  and  $E^2_{Cyss/Cys}$ .

$$12 \quad E^2_{HHcy/Hcy} = E^0_{HHcy/Hcy} + \frac{RT}{nF} \ln \frac{C'_{HHcy}}{C'_{Hcy}} \quad (4)$$

$$13 \quad E^2_{Cyss/Cys} = E^0_{Cyss/Cys} + \frac{RT}{nF} \ln \frac{C'_{Cyss}}{C'_{Cys}} \quad (5)$$

14 Since the reactions is according to the concentration ratio of 2:1, as below:

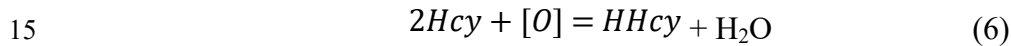

16 If there is  $\frac{1}{2}C_{Hcy}$  reacted [O] to generate  $\frac{1}{4}C_{HHcy}$ , After the reactions, the concentrations  
17 of Hcy and HHcy are  $C'_{Hcy}$  and  $C'_{HHcy}$ , then:

$$18 \quad C'_{Hcy} = \frac{1}{2}C_{Hcy} \quad (7)$$

$$19 \quad C'_{HHcy} = C_{HHcy} + \frac{1}{4}C_{HHcy} = \frac{5}{4}C_{HHcy} \quad (8)$$

20 The Equation 4 could be show as:

$$E2_{HHcy/Hcy} = E0_{HHcy/Hcy} + \frac{RT}{nF} \ln \frac{\frac{5}{4}C_{HHcy}}{\frac{1}{2}C_{Hcy}} = E0_{HHcy/Hcy} + \frac{RT}{nF} \ln \frac{5C_{HHcy}}{2C_{Hcy}} \quad (9)$$

22 The same goes for Cys/Cyss in the Equation 5:

$$E2_{Cyss/Cys} = E0_{Cyss/Cys} + \frac{RT}{nF} \ln \frac{C_{Cyss} + \frac{1}{4}C_{HHcy}}{C_{cys} - \frac{1}{2}C_{Hcy}} \quad (10)$$

24 From Table 6, we hypothesis that:

$$C_{Cyss} = 10C_{HHcy}; \quad C_{Cys} = 10C_{Hcy} \quad (11)$$

26 Then the Equation 10 could be show as:

$$\begin{aligned} E2_{Cyss/Cys} &= E0_{Cyss/Cys} + \frac{RT}{nF} \ln \frac{10C_{HHcy} + \frac{1}{4}C_{HHcy}}{10C_{Hcy} - \frac{1}{2}C_{Hcy}} \\ &= E0_{Cyss/Cys} + \frac{RT}{nF} \ln \frac{41C_{HHcy}}{38C_{Hcy}} \end{aligned} \quad (12)$$

29 The difference of  $E_{HHcy/Hcy}$  after and before the reaction is  $\Delta E_{HHcy/Hcy}$ :

$$\begin{aligned} \Delta E_{HHcy/Hcy} &= E2_{HHcy/Hcy} - E1_{HHcy/Hcy} \\ \Delta E_{HHcy/Hcy} &= E0_{HHcy/Hcy} + \frac{RT}{nF} \ln \frac{5C_{HHcy}}{2C_{Hcy}} - E0_{HHcy/Hcy} - \frac{RT}{nF} \ln \frac{C_{HHcy}}{C_{Hcy}} = \frac{RT}{nF} \ln \frac{5}{2} \end{aligned} \quad (13)$$

33 The difference of  $E_{Cyss/Cys}$  before and after the reaction is  $\Delta E_{Cyss/Cys}$ :

$$\begin{aligned} \Delta E_{Cyss/Cys} &= E2_{Cyss/Cys} - E1_{Cyss/Cys} \\ \Delta E_{Cyss/Cys} &= E0_{Cyss/Cys} + \frac{RT}{nF} \ln \frac{41C_{HHcy}}{38C_{Hcy}} - E0_{Cyss/Cys} - \frac{RT}{nF} \ln \frac{C_{Cyss}}{C_{Cys}} \\ &= \frac{RT}{nF} \ln \frac{41C_{HHcy}}{38C_{Hcy}} - \frac{RT}{nF} \ln \frac{10C_{HHcy}}{10C_{Hcy}} = \frac{RT}{nF} \ln \frac{41}{38} \end{aligned} \quad (14)$$

37 The ratio of Equation 13 to Equation 14 is R:

$$R = \frac{\Delta E_{HHcy/Hcy}}{\Delta E_{Cyss/Cys}} = \frac{\frac{RT}{nF} \ln \frac{5}{2}}{\frac{RT}{nF} \ln \frac{41}{38}} = 12.06 \quad (15)$$

38

39
